# Supplementary material for: Adipose Tissue Protects against Hepatic Steatosis in Male Rats Fed a High-Fat Diet plus Liquid Fructose: Sex-Related Differences
Source: MDPI journal article supplement (doi:10.3390/nu15183909), 2023-09-08
Supplement: s1 [file s1]

**Table S1. Composition of diets used in the study**

| <b>Composition</b>        | <b>2018 Teklad 18% Protein Rodent Diet</b> | <b>Teklad Custom Diet TD. 180456</b> |
|---------------------------|--------------------------------------------|--------------------------------------|
| Protein, % by weight      | 18.6                                       | 17.3                                 |
| Carbohydrate, % by weight | 44.2                                       | 41.7                                 |
| Fat, % by weight          | 6.2                                        | 23.2                                 |
| Protein, % kcal from      | 24                                         | 15.5                                 |
| Carbohydrate, % kcal from | 58                                         | 37.5                                 |
| Fat, % kcal from          | 18                                         | 46.9                                 |
| Calorie density (Kcal/g)  | 3.1                                        | 4.4                                  |
| Cholesterol mg/kg         | 0                                          | 0                                    |
| Carbohydrate origin       | starches                                   | starches                             |
| Fat origin                | Soybean oil                                | Soibean oil + Cocoa butter           |

**Table S2. Primers used in RT-qPCR analysis.**

| <b>Gene</b>                     | <b>GenBank TM</b> | <b>Primer sequences</b>                                                           | <b>PCR product</b> |
|---------------------------------|-------------------|-----------------------------------------------------------------------------------|--------------------|
| <b>Aco</b>                      | NM_017340.2       | Forward: 5'-GTGAGGCGCCAGTCTGAAA-3'<br>Reverse: 5'-ACTGCTGGGTTTGAAAATCCA-3'        | 70 bp              |
| <b>Bip</b>                      | NM_013083.2       | Forward: 5'-TGATAATCAGCCCACCGTAACA-3'<br>Reverse: 5'-CAAATGTACCCAGAAGGTGATTGTC-3' | 83 bp              |
| <b>Egr1</b>                     | NM_012551.3       | Forward: 5'-GCACCTGACCACAGAGTCCTTT-3'<br>Reverse: 5'-AGAAGCGGCCAGTATAGGTGA-3'     | 119 bp             |
| <b>Cd36</b>                     | NM_031561.2       | Forward: 5'-CGTATGGTGTGCTGGACATTG-3'<br>Reverse: 5'-CTTGCATGTAGGAAATGTGGAAGA-3'   | 79 bp              |
| <b>Chrebp<math>\beta</math></b> | NM_133552.2       | Forward: 5'-TGTTCA GCCGAATCTTGTCC -3'<br>Reverse: 5'-TGTTCA GCCGAATCTTGTCC -3'    | 125 bp             |
| <b>Cpt1a</b>                    | NM_031559.2       | Forward: 5'- TGCAGAACACGGCAAAATGA-3'<br>Reverse: 5'- CCGACCTGAGAGGACCTTGA-3'      | 70 bp              |
| <b>Dgat2</b>                    | NM_001012345      | Forward: 5'-GGAACCGCAAAGGCTTTGTA-3'<br>Reverse: 5'-GGAATAGGTGGGAACCAGATCA-3'      | 65 bp              |
| <b>F4/80</b>                    | NM_001007557.1    | Forward: 5'-CAGATGGGGGATGACCACAC-3'<br>Reverse: 5'-AACTCTCCGTGGTGTCA GTG-3'       | 116 bp             |
| <b>Fas</b>                      | NM_017332.1       | Forward: 5'- CCAACCGGCTCTCTTTCTTCT -3'<br>Reverse: 5'- GGCTAGAGGAGCAGGCTGTGT -3'  | 72 bp              |
| <b>Fgfr1</b>                    | NM_024146.2       | Forward: 5'-GCACCTGACCACAGAGTCCTTT-3'<br>Reverse: 5'-AGAAGCGGCCAGTATAGGTGA-3'     | 119 bp             |
| <b>Klb</b>                      | XM_039092743.1    | Forward: 5'- TGAGTCTGTTCTTAAGCCGGAG -3'<br>Reverse: 5'- TGCATTGGGACGGTCTTGTT-3'   | 140 bp             |
| <b>Leptin</b>                   | NM_013076.3       | Forward: 5'-GGTCACCGGTTTGGACTTCA-3'<br>Reverse: 5'-GGTCTGGTCCATCTTGGACAA-3'       | 67 bp              |
| <b>Mest</b>                     | NM_001009617.2    | Forward: 5'-GACCCTGAGGTTCCATCGAG -3'<br>Reverse: 5'-ACTGATGTGGTCTCGGCTTG-3'       | 77 bp              |
| <b>PPary-2</b>                  | NM_001145366.1    | Forward: 5'-AGCTGTGAACCACTAATATCCAAG-3'<br>Reverse: 5'-GGTCCACAGAGCTGATTCCG-3'    | 123 bp             |
| <b>PCNA</b>                     | NM_022381.3       | Forward: 5'- GCAACTTGGAATCCCAGAACA -3'<br>Reverse: 5'- TCCCGGCATATACGTGCAAA -3'   | 79 bp              |

|               |                |                                                                                 |        |
|---------------|----------------|---------------------------------------------------------------------------------|--------|
| <b>Pnpla3</b> | NM_001282324.1 | Forward: 5'- AGTCTCCCTCTCGATCACATCA -3'<br>Reverse: 5'- TGTGAAGAACGGGTGGAGG -3' | 94 bp  |
| <b>Tnfa</b>   | NM_012675.3    | Forward: 5'-ATCCGAGATGTGGAAGTGGC -3'<br>Reverse: 5'-CGATCACCCCGAAGTTCAGTA -3'   | 151 pb |
| <b>Xbp1s</b>  | NM_001271731.1 | Forward: 5'-GAGTCCGCAGCAGGTG-3'<br>Reverse: 5'-CGTCAGAATCCATGGGAA -3'           | 64 bp  |

**Table S3. Antibodies used in western blot analysis.**

| <b>Antibody</b>        | <b>Reference Number</b> |
|------------------------|-------------------------|
| <b>ACLY</b>            | Cell Signaling (# 4332) |
| <b>AKT</b>             | Cell Signaling (# 9272) |
| <b>P(Ser473)-AKT</b>   | Cell Signaling (# 4058) |
| <b>ATGL</b>            | Santa Cruz (sc-365278)  |
| <b>β3-AR</b>           | Santa Cruz (sc-515763)  |
| <b>FAS</b>             | Santa Cruz (sc-55580)   |
| <b>HSL</b>             | Cell Signaling (# 4107) |
| <b>P(Ser660)-HSL</b>   | Cell Signaling (# 4126) |
| <b>IRE1α</b>           | Abcam (ab37073)         |
| <b>p(Ser724)-IRE1α</b> | Abcam (ab48178)         |
| <b>IRS-2</b>           | Santa Cruz (sc-1555)    |
| <b>P(Thr197)-PKA C</b> | Cell Signaling (#4781)  |
| <b>PKAα C</b>          | Santa Cruz (sc-28315)   |
| <b>PDE3B</b>           | Santa Cruz (sc-376823)  |
| <b>PEPCK-C (I-17)</b>  | Santa Cruz (sc-74823)   |
| <b>PERK (B-5)</b>      | Santa Cruz (sc-377400)  |
| <b>P(Thr982)-PERK</b>  | Mybiosouce (MBS9416902) |
| <b>β-TUBULIN</b>       | Sigma-Aldrich (T4026)   |
| <b>UCP1 (A-6)</b>      | Santa Cruz (sc-518024)  |
| <b>VINCULIN</b>        | Santa Cruz (sc-73614)   |
